# Supplementary material
Source: publisher site journal article supplement (https://www.dovepress.com/article/258219)
Supplement: Supplementary file 1 [file get_supplementary_file.php]

**Supplementary**

**Supplementary table 1. Variable definition scheme**

|  | Variable heading | Variable explanation | Variable unit |
| --- | --- | --- | --- |
| Demographics |  |  |  |
|  | Date of birth | Based on the civil registration number |  |
|  | Sex | Female/Male |  |
|  | Date of symptoms | Date of the first symptoms according to medical records |  |
|  | Age at time of diagnosis | Age at the first GCA-related hospital contact |  |
|  | Date of diagnosis | Date of first GCA-related hospital contact to |  |
| Biochemistry |  |  |  |
|  | CRP at the time of diagnosis | The CRP value within ±2 weeks of the diagnosis. In case of several values, the value closest to the time of diagnosis and prior to the initiation of GC was selected. | mg/L |
|  | Sedimentation rate at the time of diagnosis | The Sedimentation rate value within ±2 weeks of the diagnosis. In case of several values, the value closest to the time of diagnosis and prior to the initiation of GC was selected. | mm/hour |
| Pathology |  |  |  |
|  | TAB performed | Yes/no, based on pathological reports. |  |
|  | TAB results | Positive/negative/inconclusive, based on pathological reports. |  |
| Imaging |  |  |  |
|  | CT scan performed | CT scan performed within ±3 months of the diagnosis. |  |
|  | CT results | Positive/negative for large-vessel vasculitis, based on radiologist reports. |  |
|  | PET/CT performed | PET/CT scan performed within ±3 months of the diagnosis. |  |
|  | PET/CT results | Positive/negative for large-vessel vasculitis, based on radiologist reports. |  |
|  | MR performed | MR scan performed within ±3 months of the diagnosis. |  |
|  | MR result? | Positive/negative for large-vessel vasculitis, based on radiologist reports. |  |
| ACR criteria |  |  |  |
|  | Age above 50 years | Age at the time of diagnosis |  |
|  | New headache | New-onset of localized headache |  |
|  | Temporal artery abnormality | Temporal artery tenderness or diminished temporal artery pulsation |  |
|  | Sedimentation rate above 50 mm/hour | The Sedimentation rate value within ±2 weeks of the diagnosis. In case of several values, the value closest to the time of diagnosis and prior to the initiation of GC was selected. |  |
|  | Abnormal TAB | TAB findings consistent with GCA (positive), based on pathological reports. |  |
| Clinical findings |  |  |  |
|  | Scalp tenderness | Localized scalp tenderness |  |
|  | Headache | New-onset localized headache |  |
|  | Jaw claudication | Jaw claudication |  |
|  | Muscle/joint pain | Localized pain/tenderness in the neck, back, shoulders or hips |  |
|  | Location of pain/stiffness | Specific location of pain/tenderness |  |
|  | Morning stiffness | Stiffness of the joints when wakening. |  |
|  | Duration of morning stiffness | Duration of morning stiffness |  |
|  | Visual disturbance | Intermittent vision loss (amaurosis fugax) or permanent vision loss on one or both eyes. |  |
|  | Fatigue | Fatigue |  |
|  | Unintentional weight loss | Non-intended weight loss ≥3 kg |  |
|  | Night sweating | Abnormal sweating in the night |  |
|  | Tender temporal artery | Tenderness of the temporal artery |  |
|  | Diminished temporal artery pulsation | Clinically determined decreased pulsation of the temporal artery. |  |
|  | Fever | Measured fever above 38 degrees Celsius. |  |
| Glucocorticoids |  |  |  |
|  | Initial dose of GCs | Initial prescribed dosage of GCs in relation to the GCA diagnosis | mg |
|  | GCs dosage after 1 month of diagnosis | Prescribed GC dosage after 1 month of the GCA diagnosis | mg |
|  | Highest GCs dosage | Highest GC dosage of GCs prescribed within the first 2 months | mg |
| Diagnosis |  |  |  |
|  | Final diagnosis | Are the symptoms, biochemistry, pathological findings, imaging, treatment, and course of disease consistent with GCA? Yes/No. |  |
|  | Differential diagnosis | Did the patient receive another diagnose instead of GCA? If yes, which? |  |
